# Supplementary material for: Deciphering the synergistic and redundant roles of CG and non‐CG DNA methylation in plant development and transposable element silencing
Source: PubMed Central journal article supplement — New Phytol. 2021 Nov 2;233(2):722–37. doi: 10.1111/nph.17804 (PMC9298111; doi:10.1111/nph.17804), 2021-11-02
Supplement: NPH-233-722-s003.pdf [file NPH-233-722-s003.pdf]

## ***New Phytologist* Supporting Information**

Article title: Deciphering the synergistic and redundant roles of CG and non-CG DNA methylation in plant development and TE silencing

Authors: Wenjie Liang, Jinchao Li, Linhua Sun, Yi Liu, Zijun Lan, and Weiqiang Qian

Article acceptance date: 11 October 2021

The following Supporting Information is available for this article:

**Fig. S1** Generation of *MET1* mutants in *Arabidopsis* using the CRISPR/Cas9 system.

**Fig. S2** Loss of DNA methylation affects endosperm development and compromises transmission through the male gametophytes in *Arabidopsis*.

**Fig. S3** Loss of DNA methylation does not affect pollen viability in *Arabidopsis*.

**Fig. S4** Loss of DNA methylation in *Arabidopsis* leads to the downregulation of some genes involved in pollen development and double fertilization in mature pollens.

**Fig. S5** Loss of DNA methylation leads to global changes of gene expression in *Arabidopsis* seedlings.

**Fig. S6** The upregulation of cell cycle-, DNA replication- and DNA repair-related genes in *Arabidopsis ddcc met1-11<sup>+/-</sup>* seedlings is not due to loss of DNA methylation in the promoters of these genes.

**Fig. S7** The *Arabidopsis ddcc met1-11<sup>+/-</sup>* mutation specifically activates a group of TEs.

**Fig. S8** CG and non-CG DNA methylation synergistically regulate chromocenter condensation in *Arabidopsis*.

**Table S1** Primers and sgRNAs used in this study.

**Tables S2–S5** (see separate files)

**Fig. S1 Generation of *met1* mutants in *Arabidopsis* using the CRISPR/Cas9 system. (a)** Schematic representation of *MET1* gene structure and the mutation sites. The sgRNA targeting sequences are highlighted in yellow and the PAM sites are underlined. The *met1-10* mutation causes a five nucleotide deletion in the first exon (highlighted in red). The *met1-11* mutation causes a ‘T’ insertion in the sixth exon (highlighted in red). Each of these mutations causes a shift in open reading frame. **(b)** Schematic diagram of mutant screening. The CRISPR constructs were transformed into the wild-type Col-0 or *ddcc* mutants (T0). The *met1* chimera plants in T1 generation were identified through DNA sequencing, and then backcrossed to Col-0 and *ddcc*, respectively, to obtain *met1*<sup>+/-</sup> *Cas9*<sup>-/-</sup> and *ddcc met1*<sup>+/-</sup> *Cas9*<sup>-/-</sup> plants in F1 generation. The *met1*<sup>-/-</sup> *Cas9*<sup>-/-</sup> and *ddcc met1*<sup>+/-</sup> *Cas9*<sup>-/-</sup> plants in F2 generation were finally identified for further experiments. The most important plant materials in each generation are highlighted by red circles.

(a)

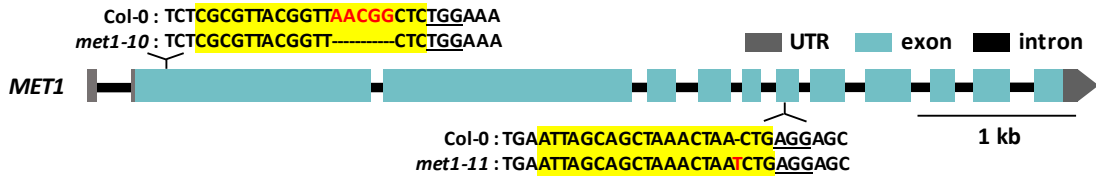

(b)

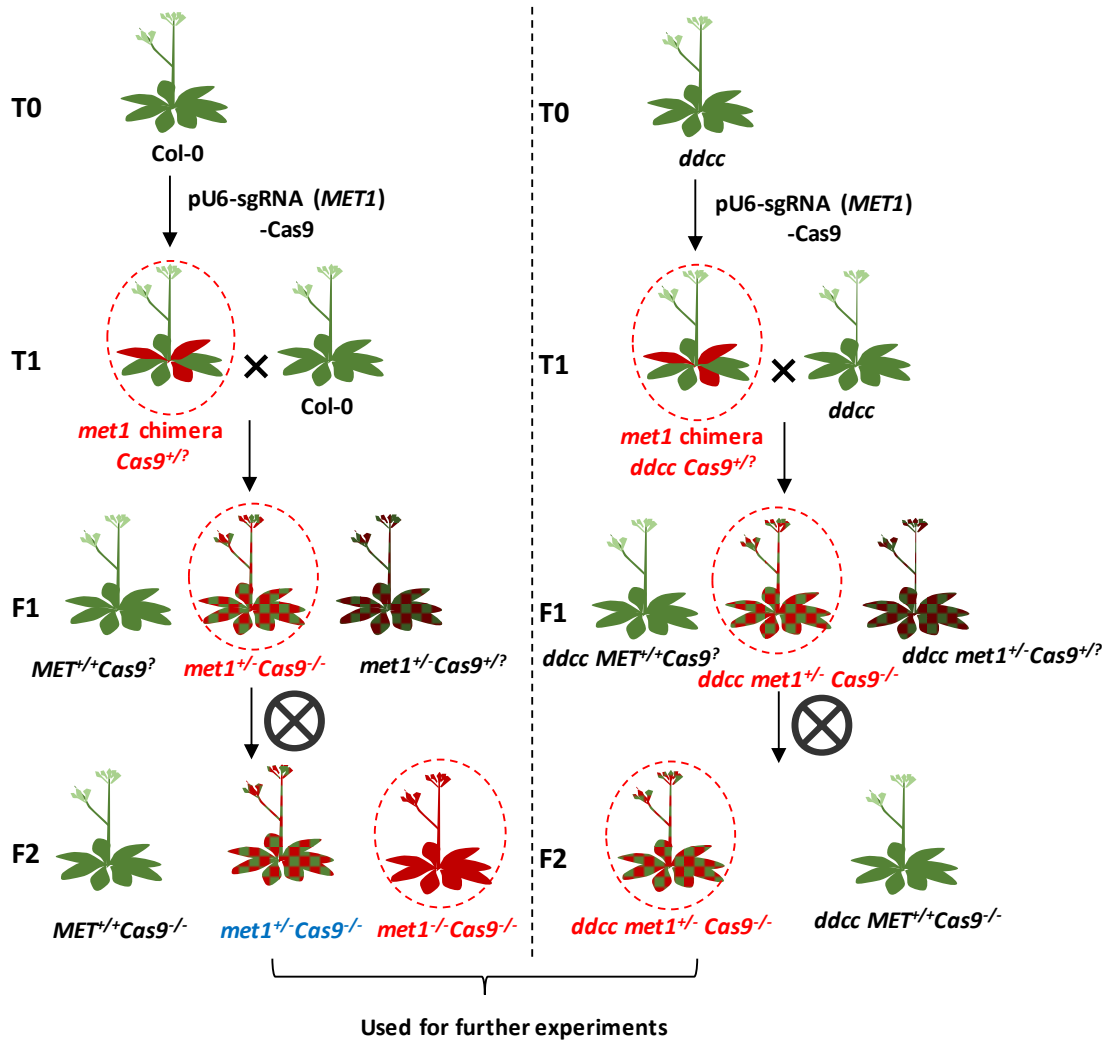

**Fig. S2 Loss of DNA methylation affects endosperm development and compromises transmission through the male gametophytes in *Arabidopsis*.** (a) DNA sequencing results showing genotypes of late aborted embryos in *ddcc met1-11*<sup>+/-</sup> siliques. Red box represents the location of sgRNA, and red arrow indicates the mutation site. (b) DIC microscopy of endosperm in *ddcc met1-11*<sup>+/-</sup> siliques at 3 d after pollination (DAP; n=127). The percentages of seeds with each type of endosperm are indicated. Black arrow indicates endosperm nucleus. ccn, central cell nucleus; ecn, egg cell nucleus. Bars, 50  $\mu$ m. (c) Seed set of hand-pollinated plants (6 DAP). Red and blue arrows indicate early- and late-aborted seeds, respectively. Bars, 1 mm.



**Fig. S3 Loss of DNA methylation does not affect pollen viability in *Arabidopsis*.** (a) Anther morphology of Col-0, *met1-11*, *ddcc*, *ddcc met1-10<sup>+/-</sup>*, and *ddcc met1-11<sup>+/-</sup>* plants as observed using cryo-SEM. Bars, 100  $\mu$ m. (b) Pollen activity of Col-0, *met1-11<sup>+/-</sup>*, *met1-11*, *ddcc*, *ddcc met1-10<sup>+/-</sup>*, and *ddcc met1-11<sup>+/-</sup>* plants as determined by Alexander dye staining. Bars, 100  $\mu$ m. (c) Percentages of normal and phenotypically abnormal pollens observed in Col-0, *met1-11<sup>+/-</sup>*, *met1-11*, *ddcc*, and *ddcc met1<sup>+/-</sup>* mutant plants. For each genotype, at least 1000 pollen grains were examined.

(a)

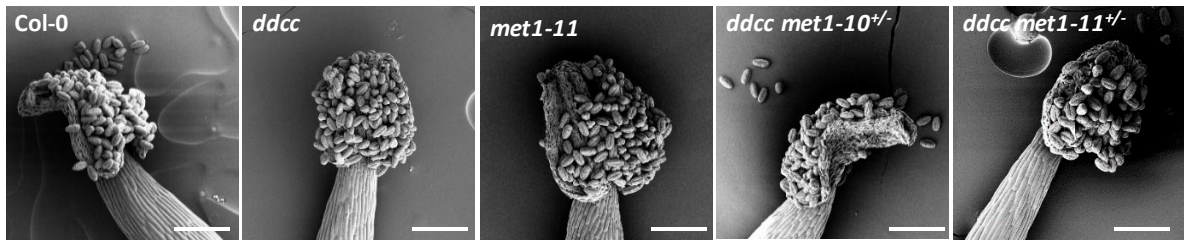

(b)

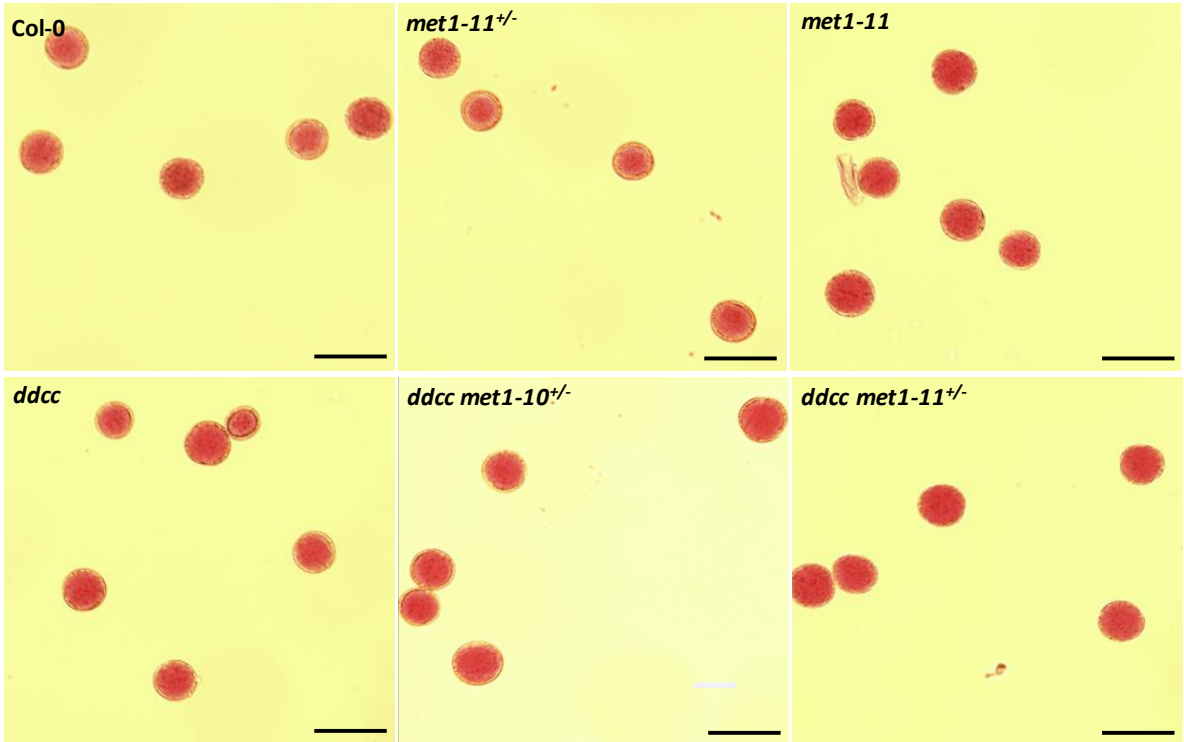

(c)

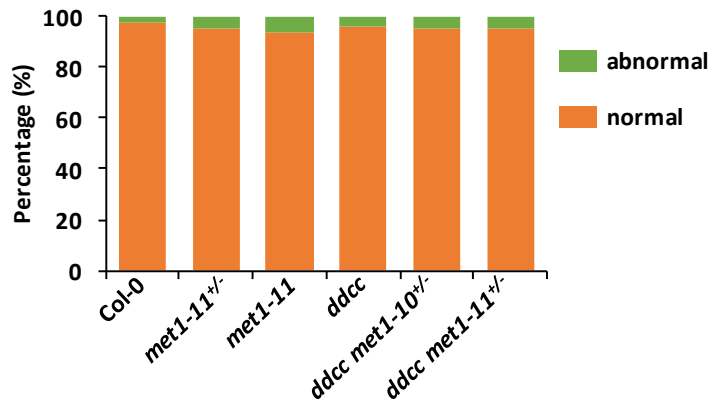

**Fig. S4 Loss of DNA methylation in *Arabidopsis* leads to the downregulation of some genes involved in pollen development and fertilization in mature pollens. (a)** Transcript levels of genes that are significantly down-regulated in mature pollen of the *ddcc met1*<sup>+/-</sup> plants. Data represent the mean ± SD of three biological replicates. Asterisks indicate significant differences between Col-0 and the indicated mutants (P < 0.05, two-tailed Student's *t*-test). **(b)** Transcript levels of genes that have little change in mature pollens of the *ddcc met1*<sup>+/-</sup> plants. *DUO1*, *MGH3*, *DAU2*, *CDKA;1*, *FBL17*, *DOU3*, *TES*, *MS11*, and *FAS1* are specifically expressed in the sperm cell; *UBQ10*, *WIP1*, and *WIT1* are specifically expressed in the vegetative cell; *ANX1*, *ANX2*, *RbohH*, and *MYB97* are genes that regulate pollen tube bursting. Data represent the mean ± SD of three biological replicates. Asterisks indicate significant differences between Col-0 and the indicated mutants (P < 0.05, two-tailed Student's *t*-test). **(c)** Snapshot in the Integrated Genome Browser showing the levels of DNA methylation at loci *DAA1*, *DAZ2*, *FAS2*, *PCR11*, and *HAP2* in the indicated genotypes. *big*: *ddcc met1-11*<sup>+/-</sup>-*big*; *small*: *ddcc met1-11*<sup>+/-</sup>-*small*.



(a)

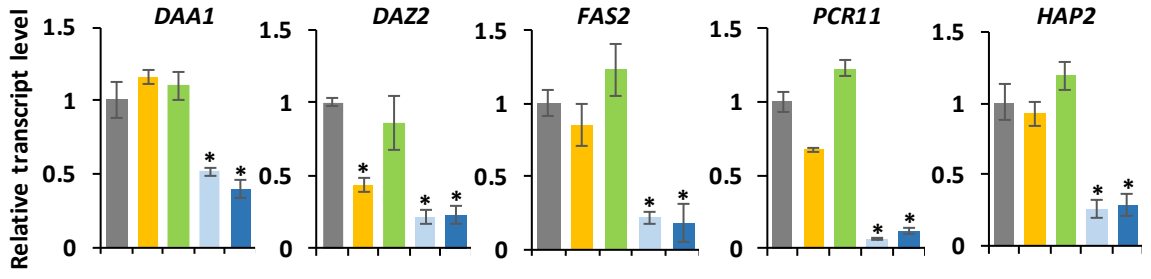

(b)

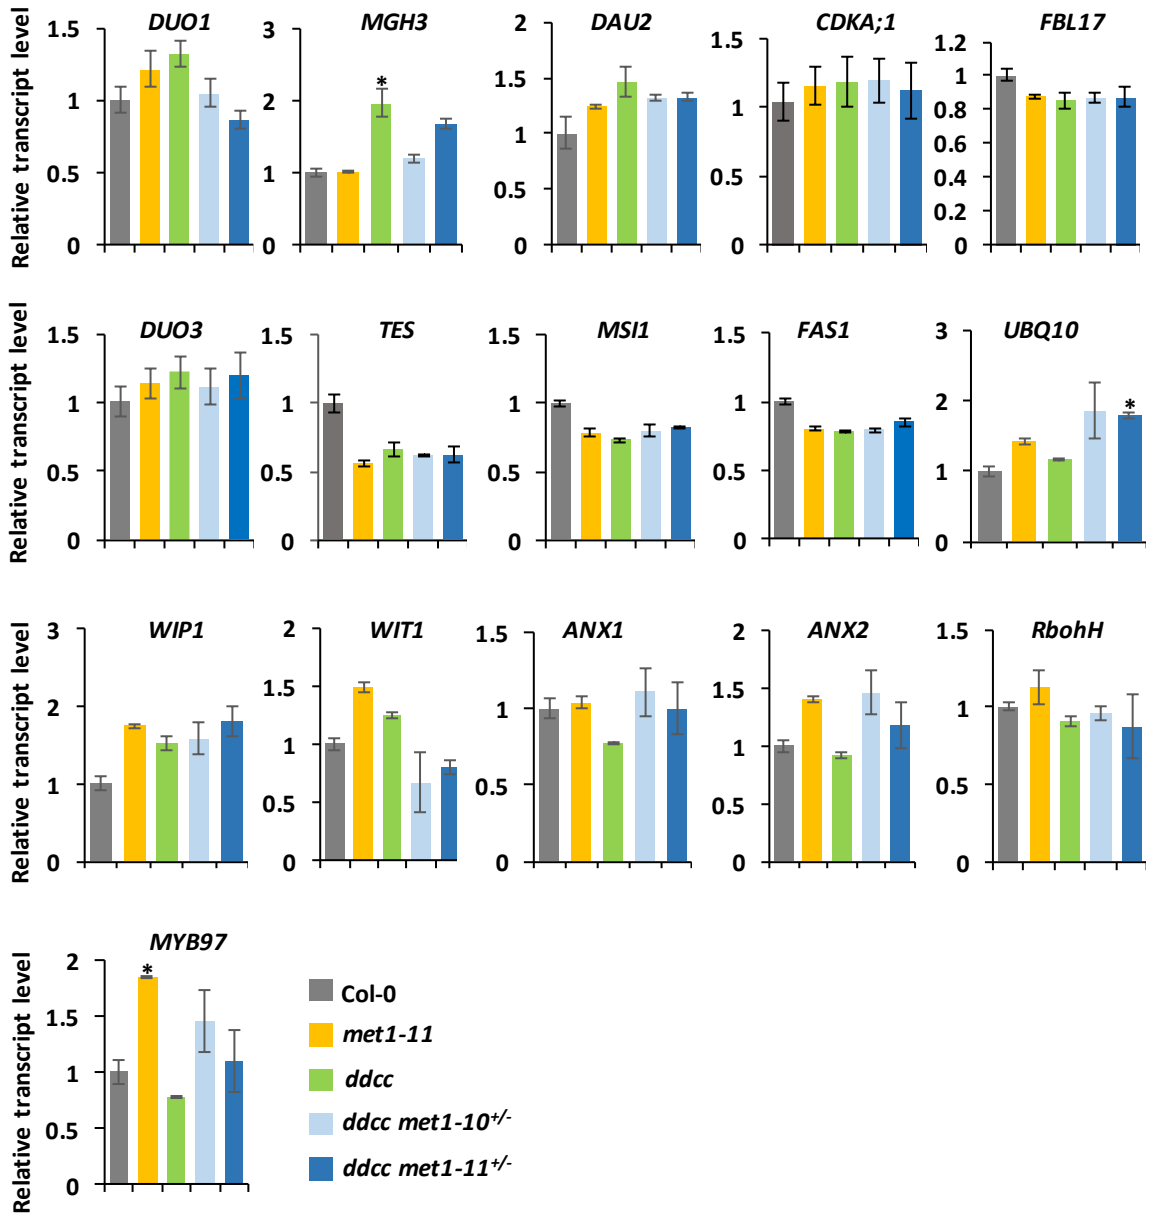

(c)

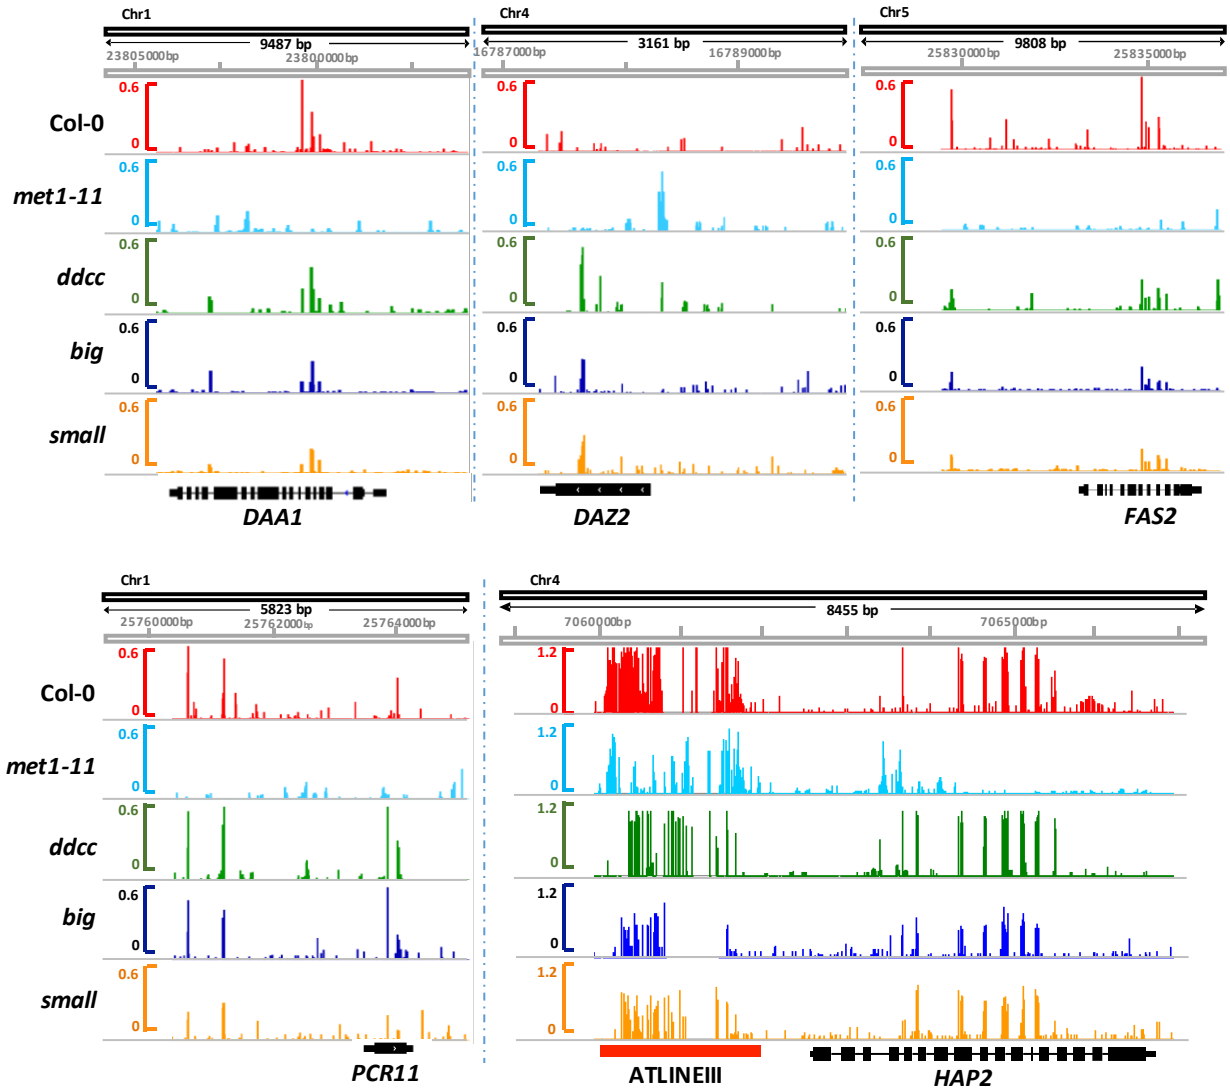

**Fig. S5 Loss of DNA methylation leads to global changes of gene expression in *Arabidopsis* seedlings. (a) Up- and down-regulated genes and transposable elements (TEs) in seedlings of different genotypes. (b) Overlap of up- and down-regulated genes and TEs between the ‘big’ and ‘small’ plants of *ddcc met1-11*<sup>+/-</sup>. The overlap was tested using Fisher's exact test.**

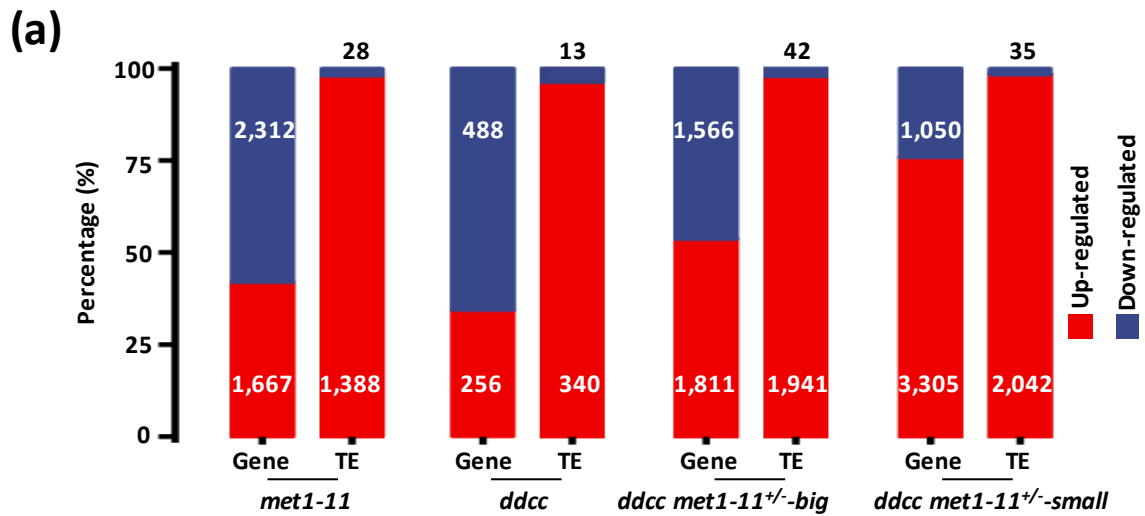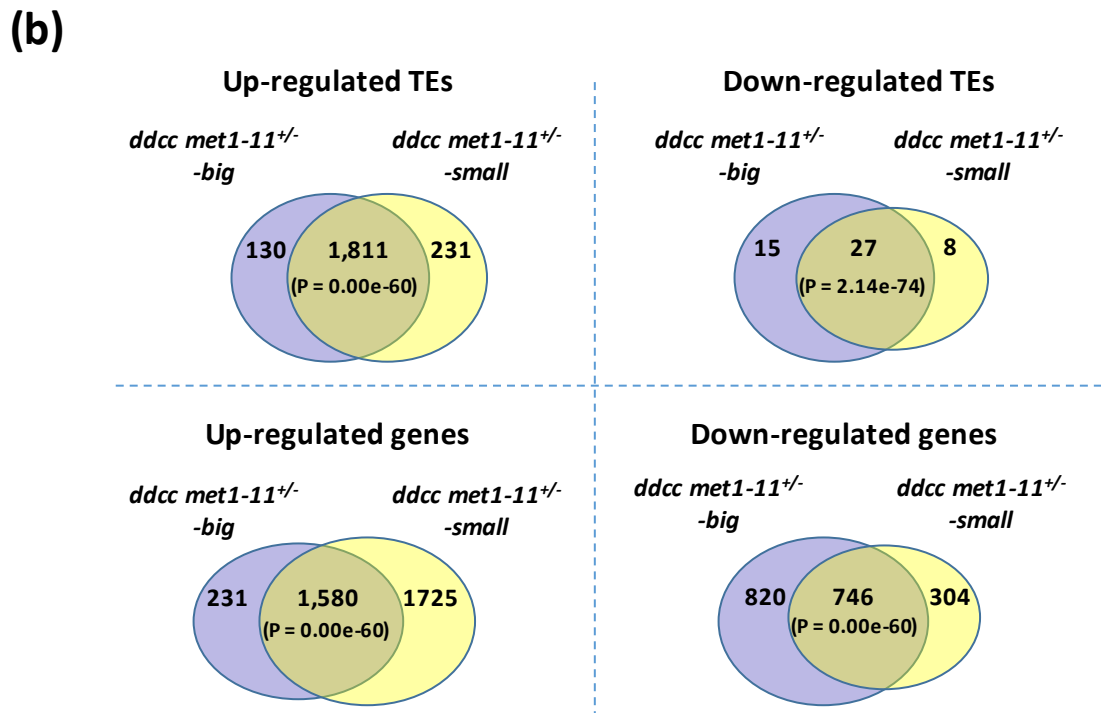

**Fig. S6 The up-regulation of cell cycle-, DNA replication- and DNA repair-related genes in *Arabidopsis ddc met1-11*<sup>+/-</sup> seedlings is not due to loss of DNA methylation in the promoters of these genes.** Plots of CG methylation levels in the promoter regions (2kb upstream of transcription start sites) of cell cycle-, DNA replication- and DNA repair-related genes in Col-0 and the big and small plants of *ddc met1-11*<sup>+/-</sup>.

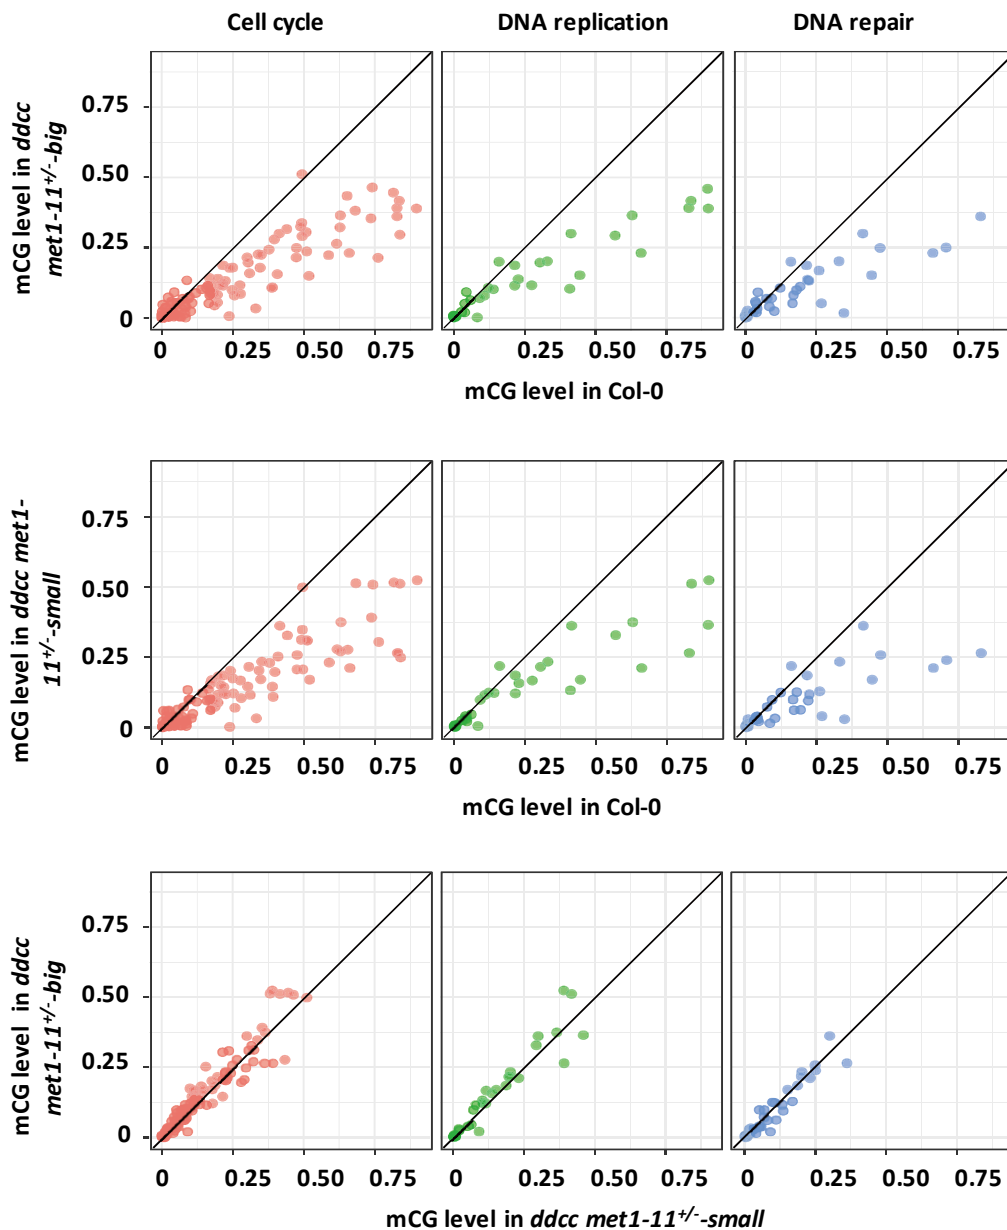

**Fig. S7. The *Arabidopsis* *ddcc met1*<sup>+/-</sup> mutations specifically activate a group of TEs. (a)** Overlap of up-regulated transposable elements (TEs) in *ddcc met1-11*<sup>+/-</sup> (activated TEs in the ‘big’ and ‘small’ plants combined), *met1-11*, *ddcc*, and *ddm1*. **(b)** Classification of the activated TEs in *ddcc*, *met1-11*, *ddm1* and TEs specifically activated in *ddcc met1-11*<sup>+/-</sup> (536 TEs), The y axis represents the percentage of individual categories. **(c)** Proportions of different transposon superfamilies in activated TEs in *ddcc*, *met1-11*, *ddm1* and TEs specifically activated in *ddcc met1-11*<sup>+/-</sup> (536 TEs). **(d)-(g)** Enrichment scores of TE families of activated TEs in *ddcc* (d), *met1-11* (e), *ddm1* (f), and TEs specifically activated in *ddcc met1-11*<sup>+/-</sup> (g). Each enrichment score was calculated as the ratio of the percentage of a certain TE family in activated TEs to that in all TEs. Numbers in the bars indicate the absolute numbers of activated TEs in the corresponding family. The red dotted line marks the point of overrepresentation (enrichment score >1). **(h)** Genome browser representation of RNA-seq and WGBS data for *AT1TE44535*, *AT2TE21060*, and *AT5TE38645*, showing transcript and methylation levels of these TEs in Col-0, *met1-11*, *ddcc*, and *ddcc met1-11*<sup>+/-</sup>. *big*: *ddcc met1-11*<sup>+/-</sup>-*big*; *small*: *ddcc met1-11*<sup>+/-</sup>-*small*.

(a)

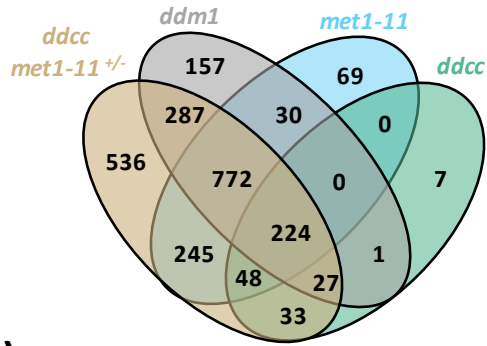

(b)

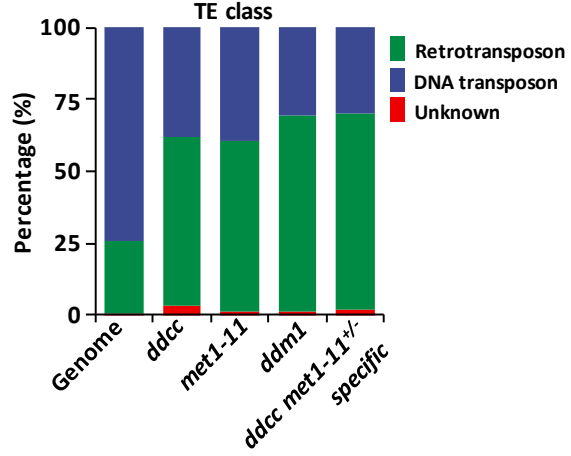

(c)

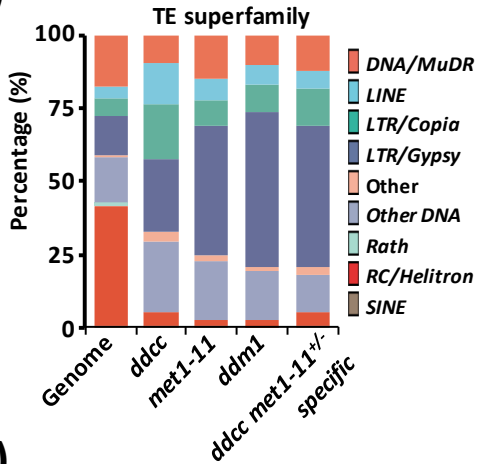

(d)

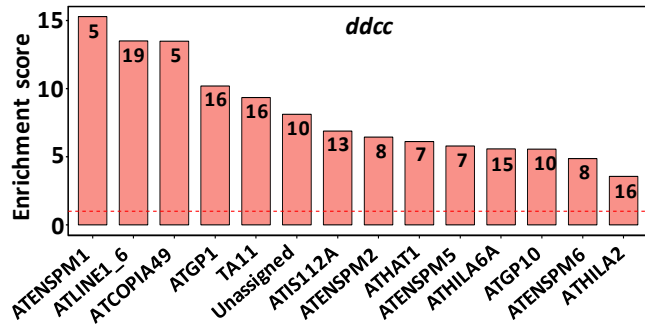

(e)

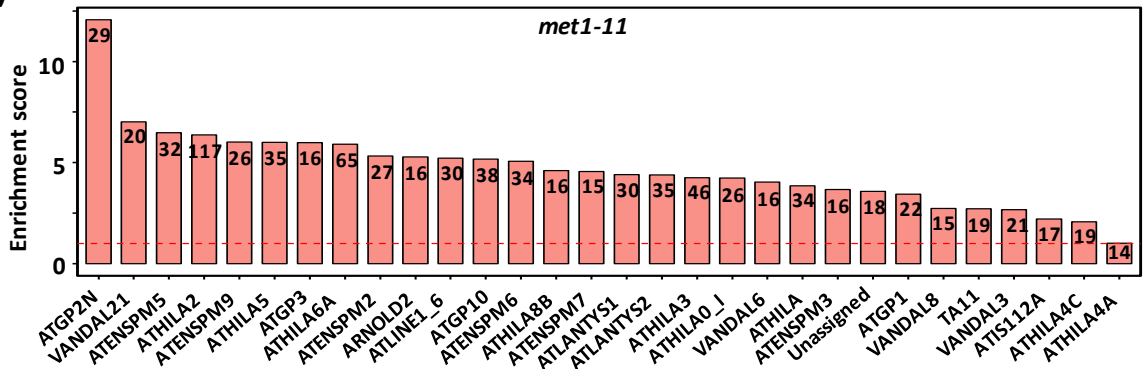

(f)

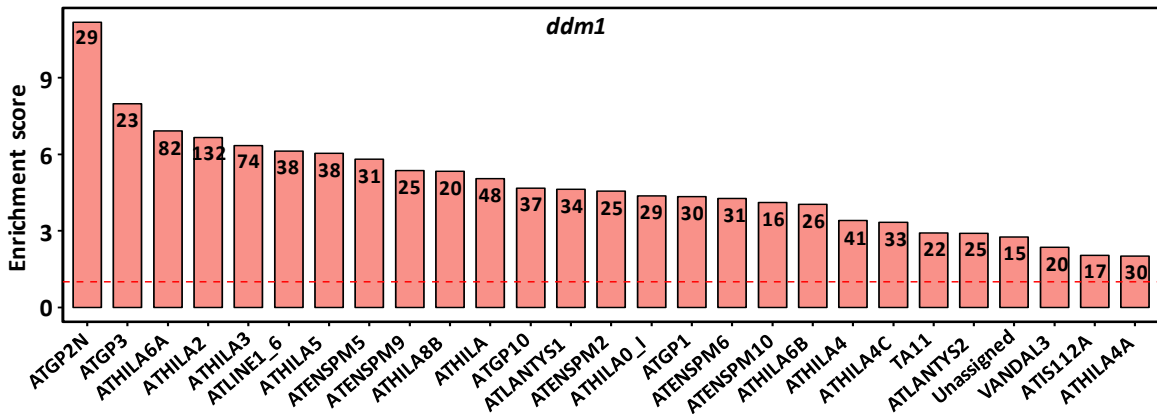

(g)

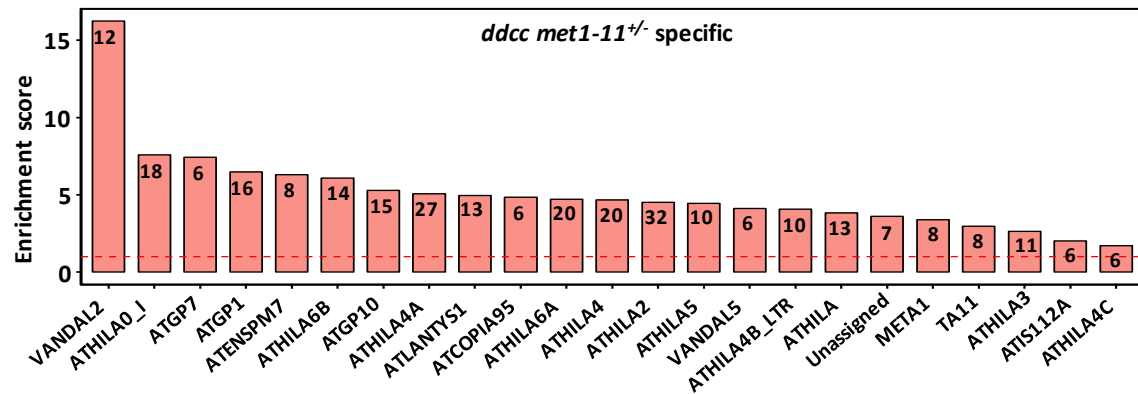

(h)

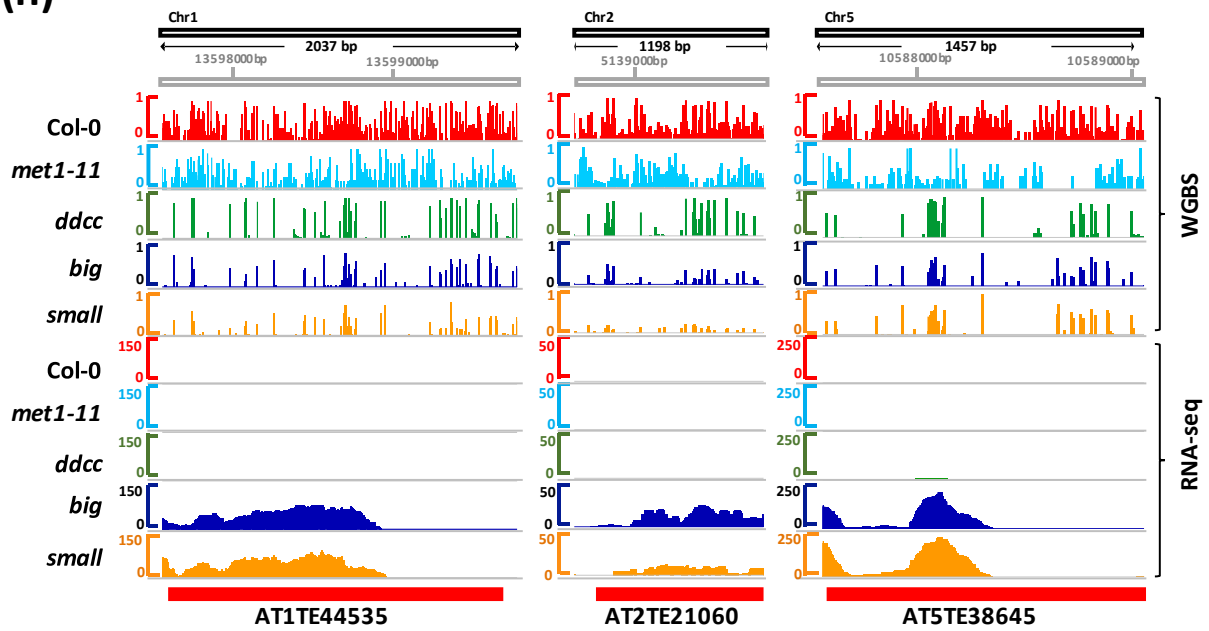

**Fig. S8 CG and non-CG DNA methylation synergistically regulate chromocenter condensation in *Arabidopsis*.**

**(a)** DAPI (4', 6-diamidino-2-phenylindole) staining patterns of different types of nuclei. Type I nuclei have six to ten conspicuous, round chromocenters. Type II nuclei have elongated chromocenters and irregularly shaped regions with strong DAPI staining. Type III nuclei have few and small chromocenters. Bars, 2  $\mu\text{m}$ .

**(b)** Percentages of three types of nuclei in the indicated plants. The error bars represent the SD of three independent experiments. Different letters indicate significant differences ( $P < 0.05$ , Fisher's Exact Test).

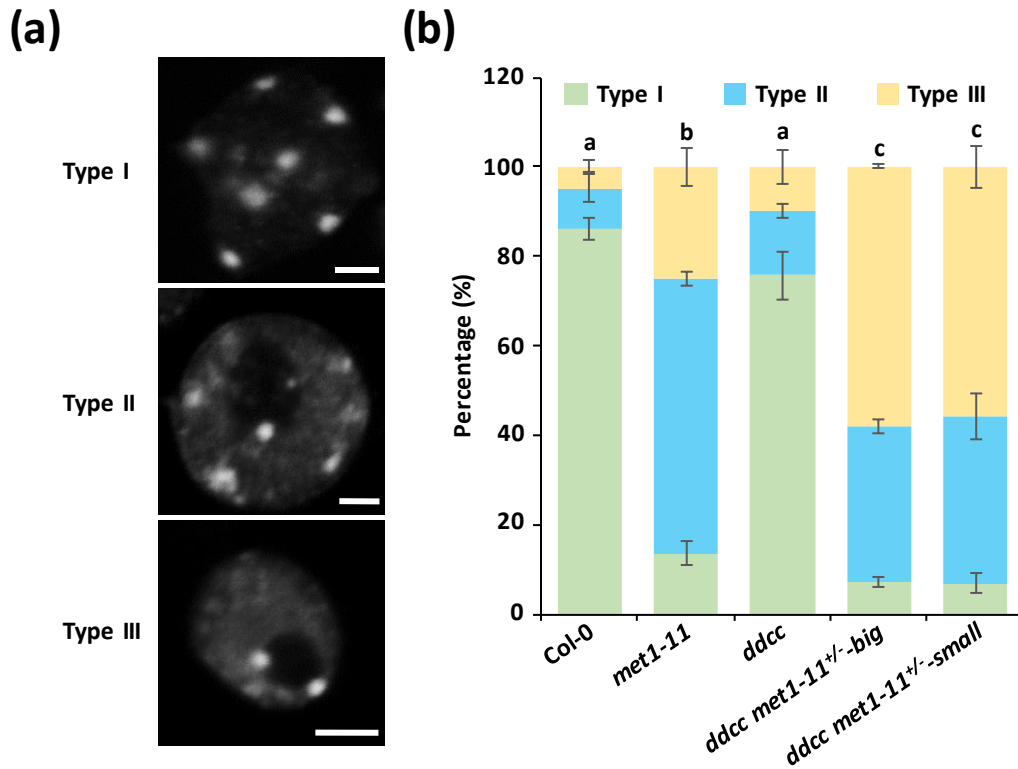



**Table S1.** Primers and sgRNAs used in this study.

| <b>Primer name</b> | <b>Sequence (5'-3')</b>    | <b>Purpose</b> |
|--------------------|----------------------------|----------------|
| MET1-10-sg-F       | GATTCGCGTTACGGTTAACGGCTC   | CRISPR         |
| MET1-10-sg-R       | AAACGAGCCGTTAACGTAACGCG    |                |
| MET1-11-sg-F       | ATTGATTAGCAGCTAAACTAACTG   |                |
| MET1-11-sg-R       | AAACCAGTTAGTTT AGCTGCTAAT  |                |
| Cas9-F1            | GCTGTTTCTGCTCATTATCCTC     |                |
| Cas9-R1            | ATTTCCAGTTTTACAAAGTGCG     |                |
| U6-26p-F           | TGTCCCAGGATTAGAATGATTAGGC  |                |
| U6-29p-R           | AGCCCTCTTCTTTTCGATCCATCAAC |                |
| U6-29p-F           | TTAATCCAAACTACTGCAGCCTGAC  |                |
| ACTIN2-F           | AACTCTCCCGCTATGTATGTCCG    |                |
| ACTIN2-R           | AACCCTCGTAGATTGGCACA       |                |
| ANX1-F             | GGTTTTAATCGGTGCCTTGTG      |                |
| ANX1-R             | TCCCTGAGATGGTTGATTTGG      |                |
| ANX2-F             | CTTCTGTGAATTCCAGCTTGC      |                |
| ANX2-R             | GATACCTTTCCACCTGTCC        |                |
| CDKA;1-F           | GCCAAAAGCCCTTATTTCTCG      |                |
| CDKA;1-R           | GTCCGTTGGTTTCCATTTAGG      |                |
| DAA1-F             | GCGGATAAGATGGAGAAGGAG      |                |
| DAA1-R             | GCATCGAAGTGCTTCAAATGG      |                |
| DAU2-F             | TGGAGAAAACAGAGGAAAGCG      |                |
| DAU2-R             | TTTGGTGAACGAGAAGGTGG       |                |
| DAZ2-F             | CCGTTGCTTCATCCTCTAGTTC     |                |
| DAZ2-R             | CCAAGACCAAAACTTTCTGCC      |                |
| DUO1-F             | CTTCTCATCGACTCAAGGGC       |                |
| DUO1-R             | ACCTCTTCTCAACCAAACC        |                |
| DUO3-F             | TGAGTTTGAGTGTGAAGAGATGG    |                |
| DUO3-R             | TCCTTGCCCTAGTTCTTTGCC      |                |
| FAS1-F             | GCGCAAACTCTGGACTTTC        |                |
| FAS1-R             | TGACTTTATGGTGCCTGATGG      |                |
| FAS2-F             | TCGAAGATTGTCATGGTCACC      |                |
| FAS2-R             | AGTGCAGGTCTTGAAAGGTC       |                |
| FBL17-F            | CTGCATAAGTTCAAGTTCAAGTCC   |                |
| FBL17-R            | CCAAGTCCACATAAAACACCAG     |                |
| HAP2-F             | GTTTGATTGCTCCAAAGGCG       |                |
| HAP2-R             | GAGTCCTTGAGTATAGCTGTGC     |                |
| MGH3-F             | AACTGCGAGGAAATCTACTGG      |                |
| MGH3-R             | TTTGCGGATCTCACGAAGAG       |                |
| MSII-F             | GGAGTAAGTTCAAGCAGGGTC      |                |

|           |                           |                  |
|-----------|---------------------------|------------------|
| MSI1-R    | ACATCTTCCACAACCCCTTC      | Real-time<br>PCR |
| MYB97-F   | ATCATACAACCTCCACTCTCAGC   |                  |
| MYB97-R   | CTCGTTATCTGTTCTGCCTGG     |                  |
| MYB120-F  | GTAACAAATGGGCTCGCATG      |                  |
| MYB120-R  | GGATGGAGTTGATGGTTAGGG     |                  |
| PCR11-F   | AGCCCAATACAATCTCAAGGAG    |                  |
| PCR11-R   | TCGTTCCATATCCCATGCC       |                  |
| RBOHH-F   | AGCTTACGGTTCCTTGATCG      |                  |
| RBOHH-R   | ACTCCATTGTGTCTCCATTC      |                  |
| TES-F     | CAGTCTCAGGGAAATAGCAGG     |                  |
| TES-R     | ACTACGGTTAATGTGGCTTCC     |                  |
| UBQ10 -F  | CCAAGATCCAAGACAAAGAGGG    |                  |
| UBQ10-R   | TGAGAACAAGATGAAGGGTGG     |                  |
| WIP1-F    | TTAACAGAGGCCATCAACGG      |                  |
| WIP1-R    | TGAATTTGCTTCGCTGACTTG     |                  |
| WIT1-F    | AACCGCCAAAGATATCGGG       |                  |
| WIT1-R    | CACCATCAACACACAATTCTCTC   |                  |
| ATR-F     | GGACTCCGCCATATTCTACAAG    |                  |
| ATR-R     | GGTCTTCAGCATCTCATACTCC    |                  |
| BRCA1-F   | CCATGTATTTTGAATGCGTG      |                  |
| BRCA1-R   | TGTGGAGCACCTCGAATCTCT     |                  |
| CDKB1;1-F | TGGCATGTTTACCCTAAGTGG     |                  |
| CDKB1;1-R | TTCGGCTGGATTGTACTTGAG     |                  |
| CDKB2;1-F | AGAGTCTCCCTGAAAGATTGC     |                  |
| CDKB2;1-R | GTGCCACCCATTACTCTACAG     |                  |
| CYCD3;3-F | AGATTGGTATACAGCTTCGTCAC   |                  |
| CYCD3;3-R | TGGAGTTCTTGAGTAGATGTGAATC |                  |
| E2F3-F    | TTGGAAGGGAGTTGATGCG       |                  |
| E2F3-R    | GGGCGAGGTTTTCAATTTCTG     |                  |
| MCM2-F    | CAGTTACAAGGGAGTGGACG      |                  |
| MCM2-R    | ATGGCTTCATGGATACTACC      |                  |
| MYB3R-4-F | TGCTTCTGATTCGTGCTCATC     |                  |
| MYB3R-4-R | TCTTGACTGAACTGTGCCAG      |                  |
| ORC3-F    | GGACTTCCTAACAGCCCAA       |                  |
| ORC3-R    | AAGGAACACTCTCAACTGGC      |                  |
| PCNA1-F   | ACCGCTAACATTGTGCTCAG      |                  |
| PCNA1-R   | CTGGCTCCTTCATCTCTATCAC    |                  |
| RPA70C-F  | TTGGGTTTCGGTTATAAGACTCAC  |                  |
| RPA70C-R  | AGCTATGCCAGGTTCTTTAG      |                  |
| TCP15-F   | TTTGGCTTCTGGTTATGGAGG     |                  |
| TCP15-R   | GTCACGGTTTTGCTGGTTG       |                  |

|         |                        |  |
|---------|------------------------|--|
| TOP3A-F | GCACGACCACATAAAGAAACTC |  |
| TOP3A-R | AGGGCTCTGAGATTTGGTTTC  |  |
| WEE1-F  | AGAACACTGTTGGCGAAGAG   |  |
| WEE1-R  | GTCCCTTCCATCTTCCGAATC  |  |
